# Supplementary material for: Vesicular trafficking through cortical actin during exocytosis is regulated by the Rab27a effector JFC1/Slp1 and the RhoA-GTPase–activating protein Gem-interacting protein
Source: PubMed Central journal article supplement — Mol Biol Cell. 2012 May 15;23(10):1902–16. doi: 10.1091/mbc.E11-12-1001 (PMC3350554; doi:10.1091/mbc.e11-12-1001), 2012-05-15
Supplement: supp_E11-12-1001_CombinedSupMats.pdf [file supp_E11-12-1001_CombinedSupMats.pdf]

## SUPPLEMENTAL MATERIALS

Johnson et al, supplementary Figure 1

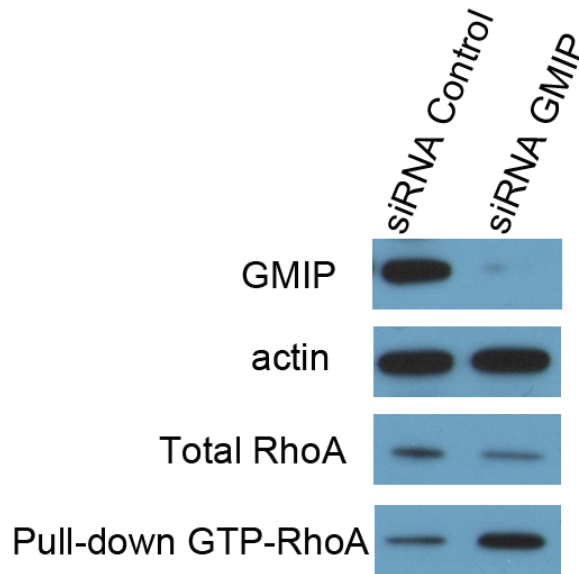

### Supplementary Figure S1

RhoA pull-down was performed using GST-RBD of Rhotekin (50  $\mu$ g) to pull-down GTP-RhoA from lysates of GMIP-downregulated or control 293T cells. The level of expression of GMIP, actin and RhoA (total RhoA) in the lysates was evaluated by Western blotting. GTP-RhoA in the pull-downs was detected using mouse monoclonal anti-RhoA (26C4) from Santa Cruz biotechnology.

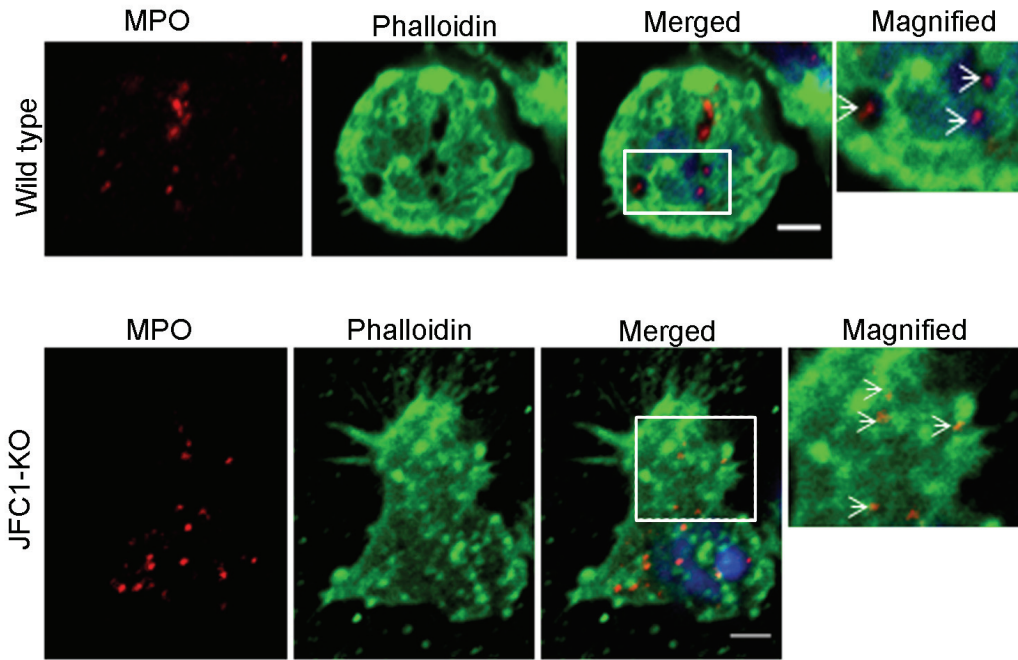

Supplementary Figure S2

Confocal microscopy analysis of the distribution of azurophilic granules related to cortical actin. JFC1-KO or control neutrophils were stimulated with fMLF for 10 min, fixed and analyzed by immunofluorescence confocal microscopy after staining for endogenous MPO or actin (Phalloidin). The arrows point at azurophilic granules that either have a halo of depolymerized actin around them (wild type) or are trapped in cortical actin (JFC1-KO).

#### Supplementary movie 1

##### Dynamics of EGFP-LAMP3 granules in a control cells

Cells were transfected with non-silencing siRNA and with a vector for the expression of the azurophilic granule marker EGFP-LAMP3. Images were obtained by TIRFM at 1 second intervals and recorded for 2 minutes. The video is shown at 6 fps.

#### Supplementary Movie 2

##### Dynamics of EGFP-LAMP3 granules in a GMIP-downregulated cell

Cells were transfected with GMIP-silencing siRNA and with a vector for the expression of the azurophilic granule marker EGFP-LAMP3. Images were obtained by TIRFM at 1 second intervals and recorded for 2 minutes. The video is shown at 6 fps.

#### Supplementary Movie 3

##### *Actin remodeling and vesicular dynamics in an untreated HL-60 cell*

Cells were transfected with YFP-actin and DsRED-JFC1 and analyzed by TIRFM. Images were obtained by TIRFM at 1 second intervals and recorded for 1 minute. The video is shown at 10 frames per second (fps).

#### Supplementary Movie 4

##### *Actin remodeling and vesicular dynamics in a cytochalasin D-treated HL-60 cell*

Cells were transfected with YFP-actin and DsRED-JFC1, treated with cytochalasin D for 30 min and analyzed by TIRFM. Images were obtained at 1 second intervals and recorded for 1 minute. The video is shown at 10 fps.
